# Supplementary material for: Limited Differences in Insect Herbivory on Young White Spruce Growing in Small Open Plantations and under Natural Canopies in Boreal Mixed Forests
Source: MDPI journal article supplement (doi:10.3390/insects15030196), 2024-03-15
Supplement: s1 [file s1]

## **Supplementary data**

Table S1. Environmental parameters and plant traits were compared between habitats in late summer 2020 and 2021 via t-test analysis.

| Habitat                  | Forest |       |       | Plantation |       |       |           |                |                     |
|--------------------------|--------|-------|-------|------------|-------|-------|-----------|----------------|---------------------|
| Variables                | N      | Mean  | SD    | N          | Mean  | SD    | <i>Df</i> | <i>p-value</i> | <i>Significance</i> |
| Tree height (m)          | 183    | 3.02  | 0.644 | 200        | 2.96  | 0.507 | 380.38    | 0.919          | ns                  |
| Developed buds           | 176    | 24.6  | 12.33 | 189        | 31.6  | 15.19 | 360.39    | <0.0001        | ***                 |
| Soil Temp (°C)           | 180    | 21.50 | 4.15  | 200        | 23.46 | 4.95  | 368.88    | <0.0001        | ***                 |
| Soil Humidity (%)        | 181    | 13.32 | 8.47  | 200        | 19.28 | 10.74 | 374.18    | <0.002         | ***                 |
| Canopy cover (%)         | 183    | 87.43 | 19.34 | 200        | 37.07 | 23.49 | 375.83    | <0.0001        | ***                 |
| Lateral growth 2021 (cm) | 91     | 5.9   | 1.89  | 100        | 10.17 | 3.46  | 187.86    | <0.0001        | ***                 |
| Lateral growth 2020 (cm) | 134    | 7.41  | 3     | 200        | 13.61 | 4.38  | 331.53    | <0.0001        | ***                 |
| Lateral growth 2019 (cm) | 134    | 7.36  | 2.56  | 200        | 13.2  | 3.9   | 332.39    | <0.0001        | ***                 |
| Lateral growth 2018 (cm) | 89     | 8.29  | 3.12  | 100        | 13.83 | 3.06  | 187.71    | <0.0001        | ***                 |
| Needle Toughness (gm)    | 80     | 50.02 | 11.76 | 77         | 56.4  | 20.6  | 152.69    | 0.02           | **                  |

(c) Statistical significance markers: ns= not significant; \*  $p<0.01$  \*\*  $p<0.05$ ; \*\*\*  $p<0.001$

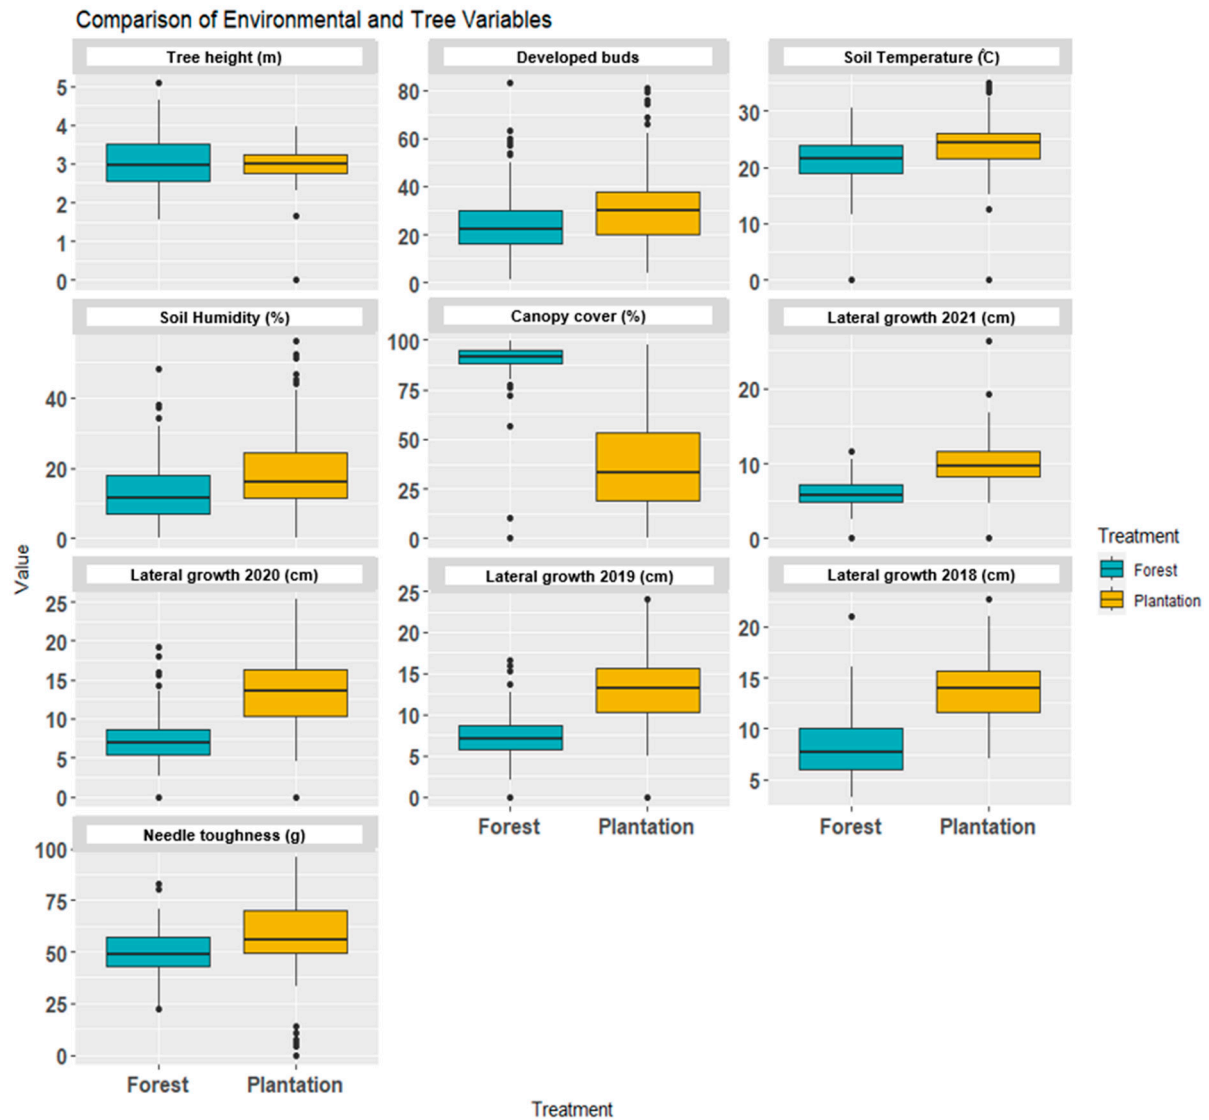

**Figure S1.** Graphical illustrations of ecological parameter comparisons between two habitats employing t-tests and statistical significance were determined (\* $p < 0.05$ , \*\* $p < 0.01$ , \*\*\* $p < 0.001$ ). The boxplots visually summarize central tendencies, spreads, and potential differences between treatments. Subplots feature key parameters, with treatment on the x-axis and corresponding measurement values on the y-axis. Variables include Tree height (m), Developed buds, Soil temperature (°C), Soil humidity (%), Canopy cover (%), Lateral shoot growth rate (cm) from 2018 to 2021, and Needle toughness (g).

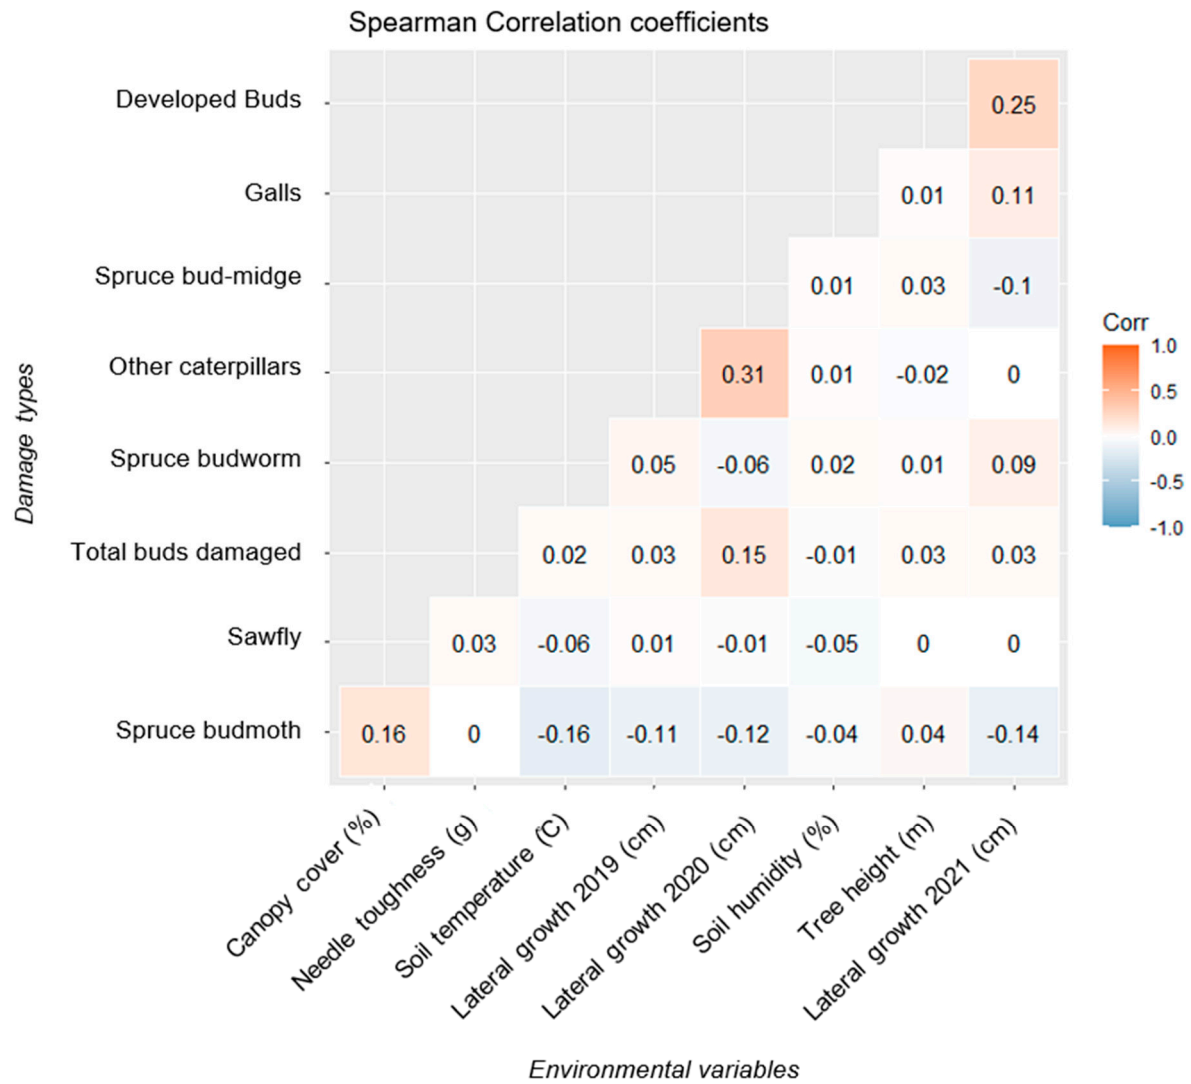

**Figure S2.** Spearman’s correlation coefficients matrix of environmental variables and damage types was executed for branch data, where the correlation coefficient ranged from -1 to 1. A value close to 1 indicates a strong positive correlation, close to -1 indicates a strong negative correlation, and close to 0 indicates a weak or no correlation.
