# Supplementary material for: Limited Differences in Insect Herbivory on Young White Spruce Growing in Small Open Plantations and under Natural Canopies in Boreal Mixed Forests
Source: Insects. 2024 Mar 15;15(3):196. doi: 10.3390/insects15030196 (PMC10971650; doi:10.3390/insects15030196)
Supplement: Supplementary file 1 [file insects-15-00196-s001.zip › Supplementry File 2_ damage manuscript.csv]

Treatment	ID	Latitude	Longitude(-)	Cover_type	Canopy_density	Height	Age_class	Forest_species	Original_Disturbance	Original_disturbance_year	Partial_Disturbance	Partial_disturbance_year	Surface_deposit	Ecological type	Area(ha)	Volume(m3/ha)
Forest	F1	48.5006	-79.45406	Leafy	(85)_From_80%_to_89%_cover	15.5m_to_16.4m	50_years	Paper_birch_(white)_60%,_Aspen_20%,_Black_spruce_10%,_Balsam_fir_10%					(1AY)_Glacial_deposit,_without_particular_morphology,_undifferentiated_till,_average_thickness_of_50_cm_to_1_m_with_rare_to_very_rare_rock_outcrops	(MS22) Fir-white birch stand on thin to thick deposit, medium texture and mesic drainage	4.8	123.649
Forest	F3	48.48496	-79.45287	Leafy	(75)_From_70%_to_79%_cover	13.5m_to_14.4m	30_years	Aspen_50%,_Paper_birch_(white)_30%,_Black_spruce_10%,_Balsam_fir_10%	CPR:_Cutting_with_regeneration_protection	1985			(4GAY)_Lacustrine,_glacio-lacustrine_deposit_(deep_water_facies),_average_thickness_of_50_cm_to_1_m_with_rare_to_very_rare_rock_outcrops	(MS23) Fir-white birch stand on thin to thick deposit, fine texture and mesic drainage	8.3	113.544
Forest	F4	48.5332	-79.48044	Mixed_with_deciduous_dominance	(85)_From_80%_to_89%_cover	12.5m_to_13.4m	30_years	Paper_birch_(white)_50%,_Aspen_poplar_20%,_Balsam_fir_30%					(4GSY)_Lacustrine,_glacio-lacustrine_deposit_(shallow_water_facies),_average_thickness_50_cm_to_1_m_with_rare_to_very_rare_rock_outcrops	(MS21) Fir-white birch stand on thin to thick deposit, coarse texture and xeric or mesic drainage	6	143.909
Forest	F5	48.42996	-79.40565	Leafy	(65)_From_60%_to_69%_cover	14.5_m_to_15.4_m	30_years	Aspen_60%,_Paper_birch_(white)_20%,_Black_spruce_10%,_Indeterminate_softwood_10%	CPR:_Cutting_with_regeneration_protection	1984			(1A)_Glacial_deposit,_without_particular_morphology,_undifferentiated_till	(MS22) Fir-white birch stand on thin to thick deposit, medium texture and mesic drainage	4.1	120.842
Forest	F6	48.43029	-79.41502	Mixed_with_deciduous_dominance	(75)_From_70%_to_79%_cover	22.5m_to_23.4m	90_years_old	Aspen_60%,_Balsam_Fir_30%,_White_Spruce_10%					(1AY)_Glacial_deposit,_without_particular_morphology,_undifferentiated_till,_average_thickness_of_50_cm_to_1_m_with_rare_to_very_rare_rock_outcrops	(MS22) Fir-white birch stand on thin to thick deposit, medium texture and mesic drainage	6.5	216.657
Forest	F7	48.43046	-79.41609	Mixed_with_deciduous_dominance	(75)_From_70%_to_79%_cover	22.5m_to_23.4m	90_years_old	Aspen_60%,_Balsam_Fir_30%,_White_Spruce_10%					(1AY)_Glacial_deposit,_without_particular_morphology,_undifferentiated_till,_average_thickness_of_50_cm_to_1_m_with_rare_to_very_rare_rock_outcrops	(MS22) Fir-white birch stand on thin to thick deposit, medium texture and mesic drainage	6.5	216.657
Forest	F8	48.42977	-79.41494	Mixed_with_deciduous_dominance	(75)_From_70%_to_79%_cover	7.5m_to_8.4m	30_years	Black_spruce_70%,_Aspen_30%	(P)_Planting	1989	EPC:_Pre-commercial_thinning	1998	(4GA)_Lacustrine,_glacio-lacustrine_deposit_(deep_water_facies)	(MS23) Fir-white birch stand on thin to thick deposit, fine texture and mesic drainage	9.9	101.889
Forest	F9	48.45317	-79.40266	Mixed_with_deciduous_dominance		2.5m_to_3.4m	10_years	Indeterminate_hardwoods_Indeterminate_reforested_softwoods	(P)_Planting	2004			(4GA)_Lacustrine,_glacio-lacustrine_deposit_(deep_water_facies)	(RS16) Fir-cedar forest on thin to thick mineral deposit, fine texture and subhydric drainage	9.9
Forest	F10	48.48526	-79.4193	Leafy	(85)_From_80%_to_89%_cover	27.5_m_to_28.4_m	90_years_old	100%_aspen_poplar	(BR)_Total_burn	1923	CP:_Partial_cut	1999	(4GA)_Lacustrine,_glacio-lacustrine_deposit_(deep_water_facies)	(MS23) Fir-white birch stand on thin to thick deposit, fine texture and mesic drainage	5.3	281.437
Plantation	P1	48.4868	-79.39836	Mixed_with_coniferous_dominance		1.5m_to_2.4m	10_years	Indeterminate_reforested_softwoods_Indeterminate_hardwoods	(P)_Planting	2010	2010		(4GA)Lacustrine,_glacio-lacustrine_deposit_(deep_water_facies)	(MS23) Fir-white birch stand on thin to thick deposit, fine texture and mesic drainage	12.8
Plantation	P2	48.48589	-79.39643	Mixed_with_resinous_dominance		1.5m_to_2.4m	10_years	Indeterminate_reforested_softwoods_Indeterminate_hardwoods	(P)_Planting	2010	2010		(4GA)_Lacustrine,_glacio-lacustrine_deposit_(deep_water_facies)	(MS23) Fir-white birch stand on thin to thick deposit, fine texture and mesic drainage	12.8
Plantation	P3	48.48155	-79.39081	Hardwood-dominated_mixed		2.5m_to_3.4m	10_years	Indeterminate_hardwoods_Indeterminate_reforested_softwoods	(P)_Planting	2010	2010		(4GA)_Lacustrine,_glacio-lacustrine_deposit_(deep_water_facies)	(MS26) Fir-white birch stand on thin to thick deposit, fine texture and subhydric drainage	3.6
Plantation	P4	48.45959	-79.4219						(CTSP_U)_Total_cut_without_uniform_protection	2016			(4GA)_Lacustrine,_glaciolacustrine_deposit_(deep_water_facies)	(MS23) Fir-white birch stand on thin to thick deposit, fine texture and mesic drainage	4.6
Plantation	P5	48.4943	-79.42732	Softwood		0.5_m_to_1.4_m	10_years	Indeterminate_reforested_softwoods	(P)_Planting	2014			(4GA)_Lacustrine,_glacio-lacustrine_deposit_(deep_water_facies)	(MS23) Fir-white birch stand on thin to thick deposit, fine texture and mesic drainage	16.2
Plantation	P6	48.48893	-79.43427	Leafy	(75)_From_70%_to_79%_cover	5.5m_to_6.4m	10_years	Reforested_hardwoods_indeterminate_100%	(P)_Planting	2005			(4GA)_Lacustrine,_glacio-lacustrine_deposit_(deep_water_facies)	(MS23) Fir-white birch stand on thin to thick deposit, fine texture and mesic drainage	3.1
Plantation	P7	48.45482	-79.43835	Mixed_predominantly_softwood	(65)_From_60%_to_69%_cover	19.5m_to_20.4m	Old_uneven-aged_stand	Jack_pine_50%,_Black_spruce_10%,_Paper_birch_(white)_30%,_Aspen_10%					(4GA)_Lacustrine,_glacio-lacustrine_deposit_(deep_water_facies)	(RS26) Black spruce fir forest on thin to thick mineral deposit, fine texture, subhydric drainage	8.1	129.756
Plantation	P8	48.45276	-79.43727	Mixed_with_deciduous_dominance		2.5m_to_3.4m	10_years	Indeterminate_hardwoods_Indeterminate_reforested_softwoods	(P)_Planting	2008			(4GA)_Lacustrine,_glacio-lacustrine_deposit_(deep_water_facies)	(RS23) Black spruce fir stand on thin to thick mineral deposit, fine texture, mesic drainage	2.7
Plantation	P9	48.4602	-79.4235						(CTSP_U)Total_cut_without_uniform_protection	2016			(4GA)_Lacustrine,_glaciolacustrine_deposit_(deep_water_facies)	(MS23) Fir-white birch stand on thin to thick deposit, fine texture and mesic drainage	4.6
Plantation	P10	48.27612	-79.25334	Leafy	(75)_From_70%_to_79%_coverage	13.5_to_14.4m	70_years	Paper_birch_(white)_70%,_Red_maple_10%,_Jack_pine_10%,_Indeterminate_softwoods_10%	(BR)_Burndown	1945			(R1A)_Glacial_deposit,_without_particular_morphology,_undifferentiated_till,_average_thickness_from_0_to_50_cm_with_frequent_rocky_outcrops	(MS60) Fir with red maple on very thin deposit, of varied texture and with xeric to hydric drainage	8.5
